# Supplementary material for: A Retrospective Survey of Research Design and Statistical Analyses in Selected Chinese Medical Journals in 1998 and 2008
Source: PubMed Central journal article supplement (PMC2876024; doi:10.1371/journal.pone.0010822), 2010-05-25
Supplement: pone.0010822.s001.pdf [file pone.0010822.s001.pdf]

**Checklist for study design and statistical analysis in Chinese medical Journals**

**Table1 Errors/defects in study design of observational research**

| <b>Study Design</b>             | <b>Applied</b>                                              | <b>Misused</b>                                              | <b>Types of error</b>                                                                                                                                                                                                                                                                                                                                                                                                                                                        |
|---------------------------------|-------------------------------------------------------------|-------------------------------------------------------------|------------------------------------------------------------------------------------------------------------------------------------------------------------------------------------------------------------------------------------------------------------------------------------------------------------------------------------------------------------------------------------------------------------------------------------------------------------------------------|
| Case Study or Case Series Study | <input type="checkbox"/> YES<br><input type="checkbox"/> NO | <input type="checkbox"/> YES<br><input type="checkbox"/> NO |                                                                                                                                                                                                                                                                                                                                                                                                                                                                              |
| Cross-Sectional Study           | <input type="checkbox"/> YES<br><input type="checkbox"/> NO | <input type="checkbox"/> YES<br><input type="checkbox"/> NO | 1 <input type="checkbox"/> No sampling when needed<br>2 <input type="checkbox"/> Inappropriate sampling method or procedure<br>3 <input type="checkbox"/> No details of sampling procedure<br>4 <input type="checkbox"/> No sample size estimating step<br>5 <input type="checkbox"/> No analysis for non-response samples<br>Others, please specify:                                                                                                                        |
| Cohort Study                    | <input type="checkbox"/> YES<br><input type="checkbox"/> NO | <input type="checkbox"/> YES<br><input type="checkbox"/> NO | 1 <input type="checkbox"/> No sampling when needed<br>2 <input type="checkbox"/> Inappropriate sampling method or procedure<br>3 <input type="checkbox"/> No details of sampling procedure<br>4 <input type="checkbox"/> No sample size estimating step<br>5 <input type="checkbox"/> No inclusion and exclusion criteria<br>6 <input type="checkbox"/> Inappropriate non-exposed group<br>7 <input type="checkbox"/> No analysis for withdrawals<br>Others, please specify: |
| Case-Control Study              | <input type="checkbox"/> YES<br><input type="checkbox"/> NO | <input type="checkbox"/> YES<br><input type="checkbox"/> NO | 1 <input type="checkbox"/> No sampling when needed<br>2 <input type="checkbox"/> Inappropriate sampling method or procedure<br>3 <input type="checkbox"/> No details of sampling procedure<br>4 <input type="checkbox"/> No sample size estimating step<br>5 <input type="checkbox"/> No inclusion and exclusion criteria<br>6 <input type="checkbox"/> Inappropriate control group<br>Others, please specify:                                                               |
| Diagnostic Test                 | <input type="checkbox"/> YES<br><input type="checkbox"/> NO | <input type="checkbox"/> YES<br><input type="checkbox"/> NO | 1 <input type="checkbox"/> No sample size estimating step<br>2 <input type="checkbox"/> No control group or inappropriate control group<br>Others, please specify:                                                                                                                                                                                                                                                                                                           |

**Table 2 Errors/defects in study design of intervention research**

| Study design                                                                                                             | Applied                                                     | Misused                                                     | Types of error                                                                                                                                                                                                                                                                                                                                                                                                                                                                                                                                                                                               |
|--------------------------------------------------------------------------------------------------------------------------|-------------------------------------------------------------|-------------------------------------------------------------|--------------------------------------------------------------------------------------------------------------------------------------------------------------------------------------------------------------------------------------------------------------------------------------------------------------------------------------------------------------------------------------------------------------------------------------------------------------------------------------------------------------------------------------------------------------------------------------------------------------|
| RCT                                                                                                                      | <input type="checkbox"/> YES<br><input type="checkbox"/> NO | <input type="checkbox"/> YES<br><input type="checkbox"/> NO | 1 <input type="checkbox"/> Unclear study aim and hypothesis<br>2 <input type="checkbox"/> Unclear primary outcome measures<br>3 <input type="checkbox"/> No sample size estimating step<br>4 <input type="checkbox"/> No inclusion and exclusion criteria<br>5 <input type="checkbox"/> No statement of intervention for each group or unclear<br>6 <input type="checkbox"/> Failure to use or report randomization<br>7 <input type="checkbox"/> No report of blindness when needed<br>8 <input type="checkbox"/> No analysis for withdrawals<br>Others, please specify:                                    |
| Does RCT register on clinical trial registration platform? 0 <input type="checkbox"/> NO, 1 <input type="checkbox"/> YES |                                                             |                                                             |                                                                                                                                                                                                                                                                                                                                                                                                                                                                                                                                                                                                              |
| Non-RCT                                                                                                                  | <input type="checkbox"/> YES<br><input type="checkbox"/> NO | <input type="checkbox"/> YES<br><input type="checkbox"/> NO | 1 <input type="checkbox"/> Unclear study aim and hypothesis<br>2 <input type="checkbox"/> Unclear primary outcome measures<br>3 <input type="checkbox"/> No inclusion and exclusion criteria<br>4 <input type="checkbox"/> No sample size estimating step when needed<br>5 <input type="checkbox"/> Failure to use or report randomization if possible<br>6 <input type="checkbox"/> Failure to use or report blinding if possible<br>7 <input type="checkbox"/> No statement of intervention for each group or unclear<br>8 <input type="checkbox"/> No analysis for withdrawals<br>Others, please specify: |
| Basic science study*                                                                                                     | <input type="checkbox"/> YES<br><input type="checkbox"/> NO | <input type="checkbox"/> YES<br><input type="checkbox"/> NO | 1 <input type="checkbox"/> No sample size estimating step<br>2 <input type="checkbox"/> Failure to report the test power<br>3 <input type="checkbox"/> No statement of intervention for each group or unclear<br>4 <input type="checkbox"/> Failure to use or report randomization<br>5 <input type="checkbox"/> No control group<br>6 <input type="checkbox"/> Use of inappropriate control group<br>Others, please specify:                                                                                                                                                                                |

\*Basic science study includes preclinical animal and laboratory in vivo and in vitro study.

Does the research need statistical analysis? 0  NO 1  YES, if “YES”, fail to use? 0  NO 1  YES

**Table 3 Statistical content and errors/defects in original articles**

| Statistical methods                    | Applied                                                     | Misused                                                     | Type of errors                                                                                                                                                                                                                                                                                                                                                                                                                                                                                                                                                            |
|----------------------------------------|-------------------------------------------------------------|-------------------------------------------------------------|---------------------------------------------------------------------------------------------------------------------------------------------------------------------------------------------------------------------------------------------------------------------------------------------------------------------------------------------------------------------------------------------------------------------------------------------------------------------------------------------------------------------------------------------------------------------------|
| Statistical description                | <input type="checkbox"/> YES<br><input type="checkbox"/> NO | <input type="checkbox"/> YES<br><input type="checkbox"/> NO |                                                                                                                                                                                                                                                                                                                                                                                                                                                                                                                                                                           |
| t-test                                 | <input type="checkbox"/> YES<br><input type="checkbox"/> NO | <input type="checkbox"/> YES<br><input type="checkbox"/> NO | 1 <input type="checkbox"/> Using multiple t-test for multiple group comparison<br>2 <input type="checkbox"/> Using paired t-test for unpaired data or vice versa<br>3 <input type="checkbox"/> Using t-test under nonparametric setting<br>4 <input type="checkbox"/> Using t-test without considering the baseline<br>Others, please specify:                                                                                                                                                                                                                            |
| Contingency tables                     | <input type="checkbox"/> YES<br><input type="checkbox"/> NO | <input type="checkbox"/> YES<br><input type="checkbox"/> NO | 1 <input type="checkbox"/> No continuity correction or Fisher exact test if needed<br>2 <input type="checkbox"/> No significant level adjustment for multiple comparison<br>3 <input type="checkbox"/> Misusing Chi-square test for paired fourfold table<br>4 <input type="checkbox"/> Using Chi-square test for ranked data<br>5 <input type="checkbox"/> Ignorance of stratification factors<br>6 <input type="checkbox"/> Using p value of Chi-square test to describe the correlation of two variables instead of contingency coefficient<br>Others, please specify: |
| Rank transformation nonparametric test | <input type="checkbox"/> YES<br><input type="checkbox"/> NO | <input type="checkbox"/> YES<br><input type="checkbox"/> NO | 1 <input type="checkbox"/> Using multiple pair-wise comparison for multiple group comparison<br>2 <input type="checkbox"/> Using wrong type of rank sum test for different study types<br>Others, please specify:                                                                                                                                                                                                                                                                                                                                                         |
| ANOVA                                  | <input type="checkbox"/> YES<br><input type="checkbox"/> NO | <input type="checkbox"/> YES<br><input type="checkbox"/> NO | 1 <input type="checkbox"/> Using completely random ANOVA to analyze multi-factor ANOVA<br>2 <input type="checkbox"/> Ignoring the setting of ANOVA for completely random design data<br>3 <input type="checkbox"/> No multiple pair-wise comparison of ANOVA when needed<br>4 <input type="checkbox"/> Misusing the method of multiple pair-wise comparison of ANOVA<br>5 <input type="checkbox"/> Using ANOVA to analyze repeated-measures data<br>Others, please specify:                                                                                               |
| Repeated-measures analysis             | <input type="checkbox"/> YES<br><input type="checkbox"/> NO | <input type="checkbox"/> YES<br><input type="checkbox"/> NO |                                                                                                                                                                                                                                                                                                                                                                                                                                                                                                                                                                           |
| Analysis of covariance                 | <input type="checkbox"/> YES<br><input type="checkbox"/> NO | <input type="checkbox"/> YES<br><input type="checkbox"/> NO |                                                                                                                                                                                                                                                                                                                                                                                                                                                                                                                                                                           |
| Pearson's correlation                  | <input type="checkbox"/> YES<br><input type="checkbox"/> NO | <input type="checkbox"/> YES<br><input type="checkbox"/> NO |                                                                                                                                                                                                                                                                                                                                                                                                                                                                                                                                                                           |

|                                                  |                                                             |                                                             |  |
|--------------------------------------------------|-------------------------------------------------------------|-------------------------------------------------------------|--|
| Simple linear regression                         | <input type="checkbox"/> YES<br><input type="checkbox"/> NO | <input type="checkbox"/> YES<br><input type="checkbox"/> NO |  |
| Nonlinear regression                             | <input type="checkbox"/> YES<br><input type="checkbox"/> NO | <input type="checkbox"/> YES<br><input type="checkbox"/> NO |  |
| Nonparametric correlation                        | <input type="checkbox"/> YES<br><input type="checkbox"/> NO | <input type="checkbox"/> YES<br><input type="checkbox"/> NO |  |
| Multiple linear regression                       | <input type="checkbox"/> YES<br><input type="checkbox"/> NO | <input type="checkbox"/> YES<br><input type="checkbox"/> NO |  |
| Logistic regression                              | <input type="checkbox"/> YES<br><input type="checkbox"/> NO | <input type="checkbox"/> YES<br><input type="checkbox"/> NO |  |
| Survival analysis                                | <input type="checkbox"/> YES<br><input type="checkbox"/> NO | <input type="checkbox"/> YES<br><input type="checkbox"/> NO |  |
| Clustering analysis                              | <input type="checkbox"/> YES<br><input type="checkbox"/> NO | <input type="checkbox"/> YES<br><input type="checkbox"/> NO |  |
| Discriminant analysis                            | <input type="checkbox"/> YES<br><input type="checkbox"/> NO | <input type="checkbox"/> YES<br><input type="checkbox"/> NO |  |
| Principle component analysis and factor analysis | <input type="checkbox"/> YES<br><input type="checkbox"/> NO | <input type="checkbox"/> YES<br><input type="checkbox"/> NO |  |
| Canonical correlation analysis                   | <input type="checkbox"/> YES<br><input type="checkbox"/> NO | <input type="checkbox"/> YES<br><input type="checkbox"/> NO |  |
| Meta analysis                                    | <input type="checkbox"/> YES<br><input type="checkbox"/> NO | <input type="checkbox"/> YES<br><input type="checkbox"/> NO |  |
| ROC                                              | <input type="checkbox"/> YES<br><input type="checkbox"/> NO | <input type="checkbox"/> YES<br><input type="checkbox"/> NO |  |
| Reliability and validity analysis                | <input type="checkbox"/> YES<br><input type="checkbox"/> NO | <input type="checkbox"/> YES<br><input type="checkbox"/> NO |  |
| Others, please specify:                          |                                                             |                                                             |  |

**Table 4 Inappropriate presentation a/o interpretation of results**

| <b>Result presentation and interpretation</b>                                         | <b>YES/NO</b>                                            |
|---------------------------------------------------------------------------------------|----------------------------------------------------------|
| <b>Types of inappropriate result presentation</b>                                     |                                                          |
| Unspecified statistical methods                                                       | <input type="checkbox"/> YES <input type="checkbox"/> NO |
| Insufficient or inappropriate description of methods                                  | <input type="checkbox"/> YES <input type="checkbox"/> NO |
| Reporting $p$ value without test statistics                                           | <input type="checkbox"/> YES <input type="checkbox"/> NO |
| $p$ values without confidence intervals                                               | <input type="checkbox"/> YES <input type="checkbox"/> NO |
| Using mean $\pm$ SD to describe non-normal data                                       | <input type="checkbox"/> YES <input type="checkbox"/> NO |
| Using proportion instead of rate                                                      | <input type="checkbox"/> YES <input type="checkbox"/> NO |
| Using arbitrary $p$ thresholds (like $p<0.01$ ) instead of reporting exact $p$ values | <input type="checkbox"/> YES <input type="checkbox"/> NO |
| Incorrect use of table                                                                | <input type="checkbox"/> YES <input type="checkbox"/> NO |
| Incorrect use of chart and figure                                                     | <input type="checkbox"/> YES <input type="checkbox"/> NO |
| Ignoring baselines of two groups                                                      | <input type="checkbox"/> YES <input type="checkbox"/> NO |
| Others, please specify:                                                               |                                                          |
| <b>Types of inappropriate result interpretation</b>                                   |                                                          |
| $p < \alpha$ , the smaller the $P$ value, the greater the difference between groups   | <input type="checkbox"/> YES <input type="checkbox"/> NO |
| $p > \alpha$ , reporting no difference between groups                                 | <input type="checkbox"/> YES <input type="checkbox"/> NO |
| $p > \alpha$ , reporting difference between groups                                    | <input type="checkbox"/> YES <input type="checkbox"/> NO |
| Others, please specify:                                                               |                                                          |
